# Supplementary material for: Dynamic reorganization of the AC16 cardiomyocyte transcriptome in response to TNFα signaling revealed by integrated genomic analyses
Source: PubMed Central journal article supplement (PMC3945043; doi:10.1186/1471-2164-15-155), 2014-02-24
Supplement: 1471-2164-15-155-S4.pdf [file 1471-2164-15-155-S4.pdf]

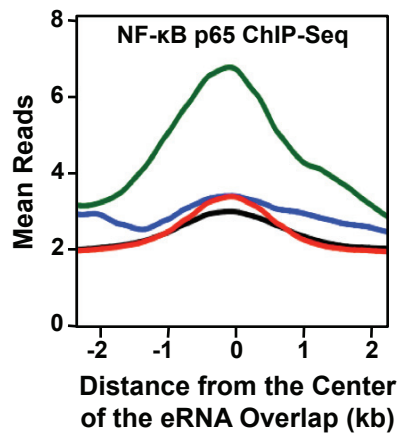

NF-κB Enhancers -TNFα  
NF-κB Enhancers +TNFα  
Non-NF-κB Enhancers -TNFα  
Non-NF-κB Enhancers +TNFα
