# Supplementary material for: Dynamic reorganization of the AC16 cardiomyocyte transcriptome in response to TNFα signaling revealed by integrated genomic analyses
Source: PubMed Central journal article supplement (PMC3945043; doi:10.1186/1471-2164-15-155), 2014-02-24
Supplement: 1471-2164-15-155-S6.pdf [file 1471-2164-15-155-S6.pdf]

| <b>A. TNF<math>\alpha</math> upregulated protein-coding genes and adjacent genomic regions</b> |                        |                              |
|------------------------------------------------------------------------------------------------|------------------------|------------------------------|
| <b>GO Biological Process</b>                                                                   | <b>Binom FDR Q-Val</b> | <b>Binom Fold Enrichment</b> |
| defense response                                                                               | 6.89E-27               | 3.53                         |
| immune response                                                                                | 6.62E-24               | 3.54                         |
| response to stress                                                                             | 5.57E-22               | 2.02                         |
| immune system process                                                                          | 1.32E-20               | 2.48                         |
| inflammatory response                                                                          | 1.15E-15               | 4.29                         |
| response to wounding                                                                           | 3.20E-15               | 2.49                         |
| regulation of programmed cell death                                                            | 4.82E-13               | 2.19                         |
| response to cytokine stimulus                                                                  | 1.09E-12               | 3.54                         |
| innate immune response                                                                         | 1.03E-12               | 3.64                         |
| regulation of cell death                                                                       | 1.08E-12               | 2.13                         |
| regulation of apoptosis                                                                        | 1.09E-12               | 2.17                         |
| regulation of cytokine production                                                              | 2.89E-12               | 3.83                         |
| regulation of response to stress                                                               | 3.44E-11               | 2.65                         |
| regulation of immune system process                                                            | 2.86E-10               | 2.36                         |
| cellular response to cytokine stimulus                                                         | 5.25E-10               | 3.89                         |
| positive regulation of response to stimulus                                                    | 1.01E-09               | 2.10                         |
| cytokine-mediated signaling pathway                                                            | 1.90E-09               | 4.44                         |
| multi-organism process                                                                         | 3.03E-09               | 2.21                         |
| positive regulation of cellular component movement                                             | 5.61E-09               | 3.29                         |
| response to other organism                                                                     | 6.27E-09               | 2.85                         |

| <b>B. TNF<math>\alpha</math> downregulated protein-coding genes and adjacent genomic regions</b> |                        |                              |
|--------------------------------------------------------------------------------------------------|------------------------|------------------------------|
| <b>GO Biological Process</b>                                                                     | <b>Binom FDR Q-Val</b> | <b>Binom Fold Enrichment</b> |
| cofactor metabolic process                                                                       | 2.00E-10               | 2.37                         |
| cofactor biosynthetic process                                                                    | 2.35972E-06            | 2.55                         |
| coenzyme metabolic process                                                                       | 5.39966E-05            | 2.01                         |

| <b>C. TNF<math>\alpha</math> upregulated lncRNA genes and adjacent genomic regions</b> |                        |                              |
|----------------------------------------------------------------------------------------|------------------------|------------------------------|
| <b>GO Biological Processes</b>                                                         | <b>Binom FDR Q-Val</b> | <b>Binom Fold Enrichment</b> |
| regulation of cell proliferation                                                       | 1.40E-07               | 2.94                         |
| multi-organism process                                                                 | 7.68E-08               | 3.64                         |
| response to mechanical stimulus                                                        | 6.38E-07               | 8.79                         |
| regulation of apoptosis                                                                | 2.40742E-06            | 2.86                         |
| response to stress                                                                     | 2.23523E-06            | 2.18                         |
| regulation of cell death                                                               | 2.02791E-06            | 2.78                         |
| negative regulation of cellular process                                                | 1.99749E-06            | 2.02                         |
| regulation of programmed cell death                                                    | 1.89378E-06            | 2.83                         |
| vasculature development                                                                | 3.23846E-06            | 3.88                         |
| positive regulation of macromolecule metabolic process                                 | 3.14824E-06            | 2.38                         |
| response to lipopolysaccharide                                                         | 3.52322E-06            | 6.90                         |

|                                           |             |      |
|-------------------------------------------|-------------|------|
| response to wounding                      | 3.59794E-06 | 3.05 |
| blood vessel development                  | 3.85106E-06 | 3.93 |
| positive regulation of metabolic process  | 5.30154E-06 | 2.28 |
| response to molecule of bacterial origin  | 4.31218E-06 | 6.44 |
| regulation of immune system process       | 4.69096E-06 | 3.28 |
| positive regulation of cell proliferation | 9.04782E-06 | 3.25 |
| response to peptidoglycan                 | 9.17262E-06 | 32.4 |
| regulation of response to stress          | 1.08144E-05 | 3.55 |
| response to cytokine stimulus             | 1.27001E-05 | 4.66 |

| <b><i>D. TNF<math>\alpha</math> upregulated enhancers and adjacent genomic regions</i></b> |                        |                              |
|--------------------------------------------------------------------------------------------|------------------------|------------------------------|
| <b>GO Biological Process</b>                                                               | <b>Binom FDR Q-Val</b> | <b>Binom Fold Enrichment</b> |
| regulation of response to stress                                                           | 1.47E-08               | 3.19                         |
| multi-organism process                                                                     | 2.91E-08               | 2.71                         |
| regulation of cell proliferation                                                           | 1.72E-07               | 2.20                         |
| regulation of cellular response to stress                                                  | 7.31E-07               | 4.18                         |
| response to abiotic stimulus                                                               | 1.09E-06               | 2.85                         |
| regulation of cytokine-mediated signaling pathway                                          | 2.03E-06               | 7.67                         |
| regulation of response to cytokine stimulus                                                | 1.89E-06               | 7.65                         |
| regulation of cytokine production                                                          | 4.87E-06               | 3.83                         |
| negative regulation of transport                                                           | 1.12E-05               | 3.79                         |
| cytokine-mediated signaling pathway                                                        | 1.29E-05               | 4.87                         |
| regulation of myeloid cell differentiation                                                 | 1.46E-05               | 5.43                         |
| positive regulation of cytokine production                                                 | 1.43E-05               | 5.09                         |
| regulation of type I interferon-mediated signaling pathway                                 | 1.41E-05               | 17.5                         |
| regulation of immune system process                                                        | 1.38E-05               | 2.42                         |
| cellular response to cytokine stimulus                                                     | 1.66E-05               | 4.06                         |
| JAK-STAT cascade                                                                           | 2.05E-05               | 12.8                         |
| cell proliferation                                                                         | 2.46E-05               | 2.53                         |
| response to other organism                                                                 | 2.61E-05               | 3.05                         |
| response to cytokine stimulus                                                              | 4.25E-05               | 3.21                         |
| cellular response to stress                                                                | 5.81E-05               | 2.27                         |

| <b><i>E. TNF<math>\alpha</math> upregulated antisense RNA genes and adjacent genomic regions</i></b> |                        |                              |
|------------------------------------------------------------------------------------------------------|------------------------|------------------------------|
| <b>GO Biological Process</b>                                                                         | <b>Binom FDR Q-Val</b> | <b>Binom Fold Enrichment</b> |
| regulation of response to stress                                                                     | 1.47E-08               | 3.20                         |
| multi-organism process                                                                               | 2.91E-08               | 2.71                         |
| regulation of cell proliferation                                                                     | 1.72E-07               | 2.20                         |
| regulation of cellular response to stress                                                            | 7.31E-07               | 4.18                         |
| response to abiotic stimulus                                                                         | 1.09E-06               | 2.85                         |
| regulation of cytokine-mediated signaling pathway                                                    | 2.03E-06               | 7.67                         |
| regulation of response to cytokine stimulus                                                          | 1.89E-06               | 7.65                         |
| regulation of cytokine production                                                                    | 4.87E-06               | 3.83                         |

|                                                            |          |      |
|------------------------------------------------------------|----------|------|
| negative regulation of transport                           | 1.12E-05 | 3.79 |
| cytokine-mediated signaling pathway                        | 1.29E-05 | 4.87 |
| regulation of myeloid cell differentiation                 | 1.46E-05 | 5.43 |
| positive regulation of cytokine production                 | 1.43E-05 | 5.09 |
| regulation of type I interferon-mediated signaling pathway | 1.41E-05 | 17.5 |
| regulation of immune system process                        | 1.38E-05 | 2.42 |
| cellular response to cytokine stimulus                     | 1.66E-05 | 4.06 |
| JAK-STAT cascade                                           | 2.05E-05 | 12.8 |
| cell proliferation                                         | 2.46E-05 | 2.53 |
| response to other organism                                 | 2.61E-05 | 3.05 |
| response to cytokine stimulus                              | 4.25E-05 | 3.21 |
| cellular response to stress                                | 5.81E-05 | 2.27 |
